# Supplementary material
Source: MDPI journal article supplement (https://www.mdpi.com/2313-4321/9/3/41)
Supplement: s1 [file s1 › recycling-2925327-supplementary.pdf]

## Supplementary File

# Effect of Recycled Concrete Aggregate Addition on the Asphalt Mixtures Performance: ITZ Area, Microstructure, and Chemical Analysis Perspectives

Hanaa Khaleel Alwan Al-Bayati <sup>1,\*</sup>, Waleed Jadaa <sup>2</sup> and Susan L. Tighe <sup>3,4</sup>

<sup>1</sup> Department of Civil Engineering, College of Engineering, Tikrit University, Tikrit 34001, Iraq

<sup>2</sup> Center for Energy and Environmental Sustainability (CEES), Prairie View A&M University, Prairie View, TX 77446, USA; wajadaa@pvamu.edu

<sup>3</sup> Provost and Vice-President Academic, Norman W. McLeod Professor of Sustainable Pavement Engineering, McMaster University, Hamilton, ON L8S 4L8, Canada; tighes1@mcmaster.ca or sltighe@uwaterloo.ca

<sup>4</sup> Adjunct Professor, Civil and Environmental Engineering, University of Waterloo, Waterloo, ON N2L 3G1, Canada

\* Correspondence: dr.hanaa.khaleel@tu.edu.iq

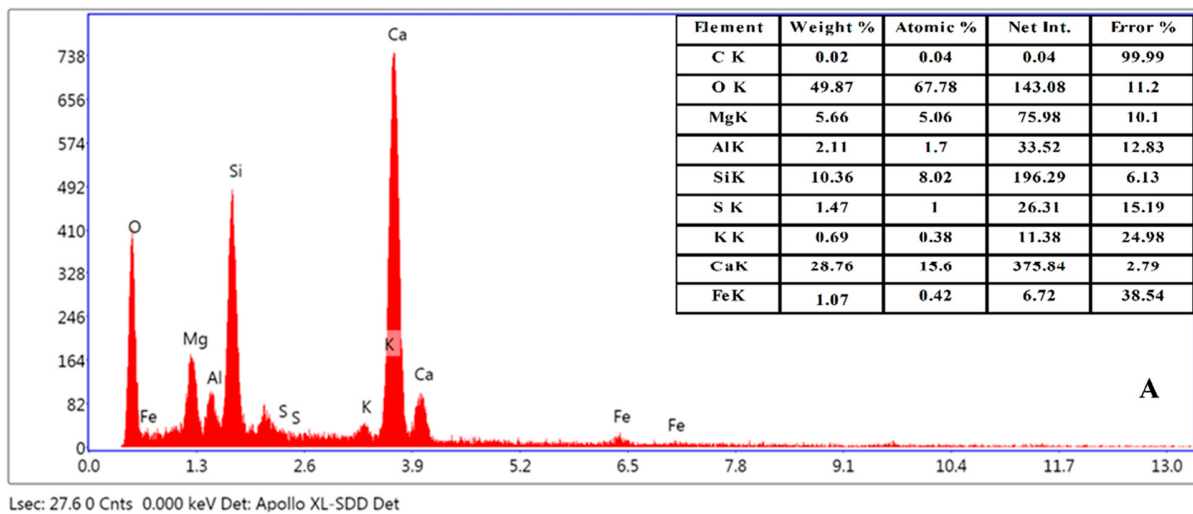

**Figure S1A: EDAX analysis of untreated CRCA.**

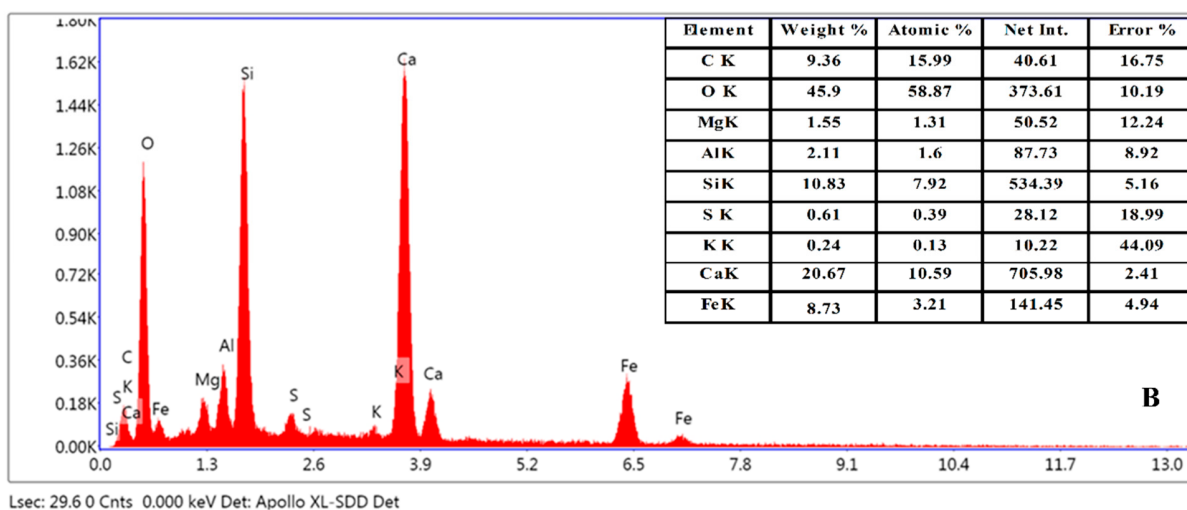

**Figure S1B: EDAX analysis of treated CRCA with heat treatment at 250°C.**

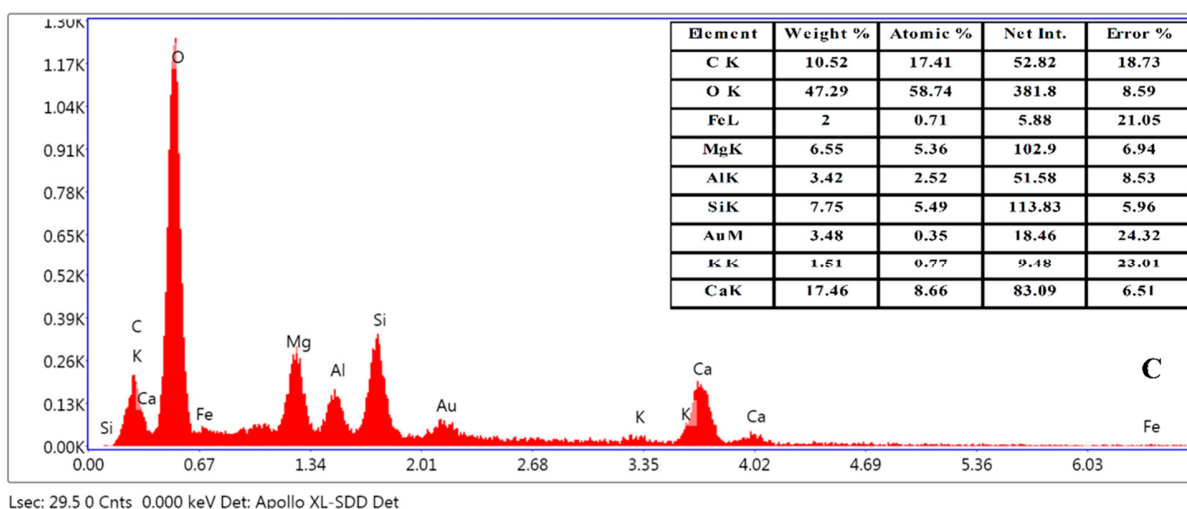

**Figure S1C: EDAX analysis of treated CRCA with heat treatment at 350°C.**

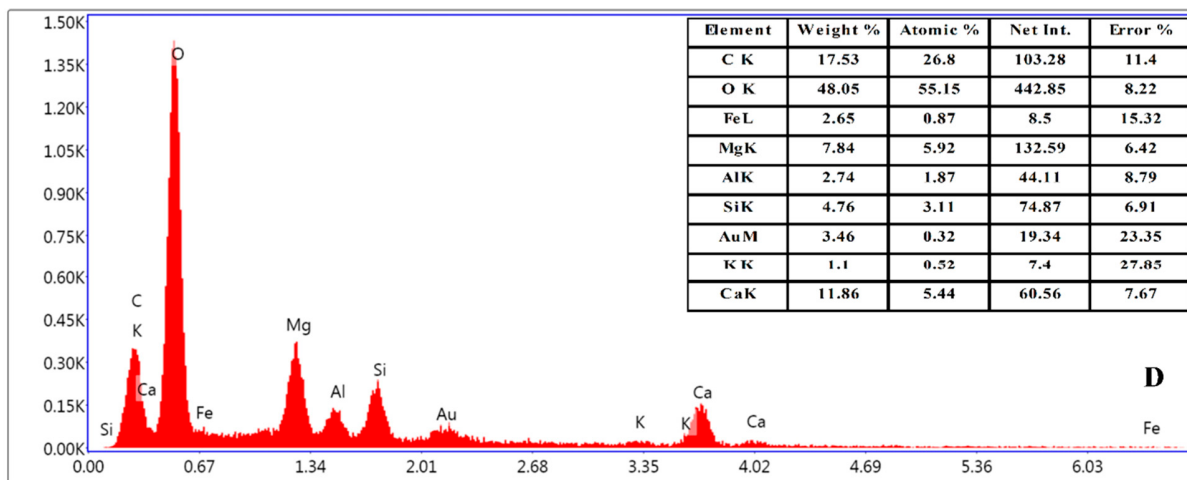

Lsec: 29.6 0 Cnts 0.000 keV Det: Apollo XL-SDD Det

**Figure S1D: EDAX analysis of treated CRCA with heat treatment at 500°C.**

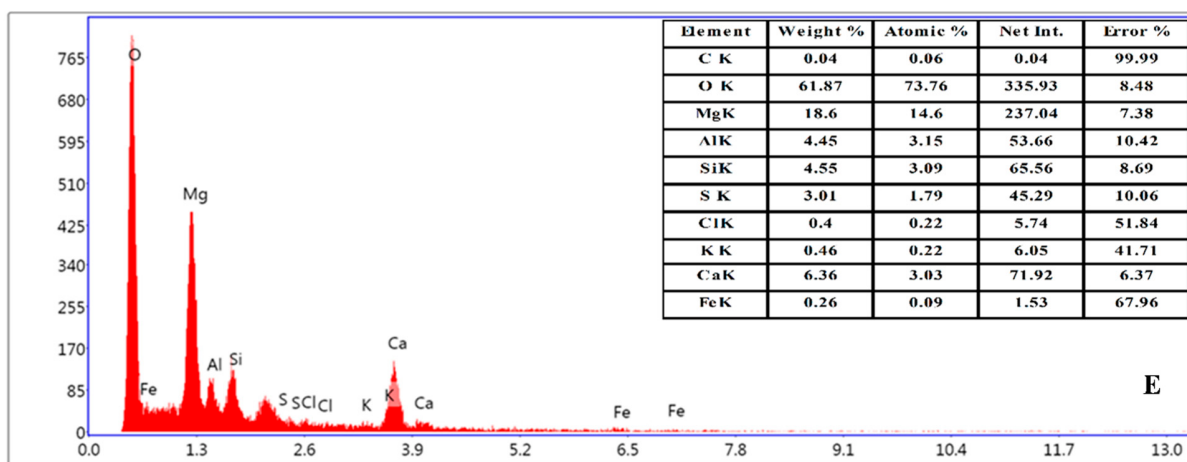

Lsec: 24.4 0 Cnts 0.000 keV Det: Apollo XL-SDD Det

**Figure S1E: EDAX analysis of treated CRCA with HCl acid.**

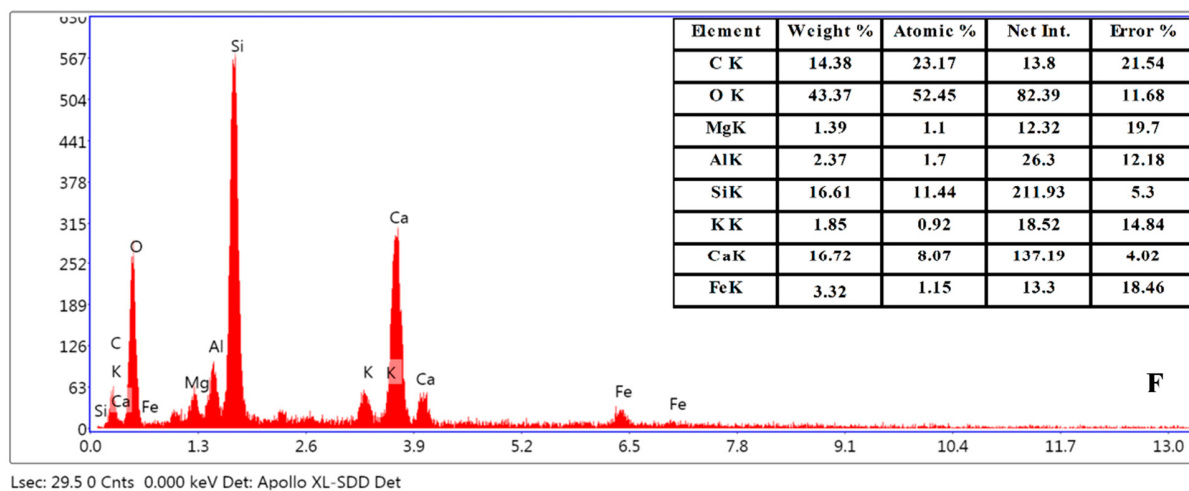

**Figure S1F: EDAX analysis of treated CRCA with C<sub>2</sub>H<sub>4</sub>O<sub>2</sub> acid.**

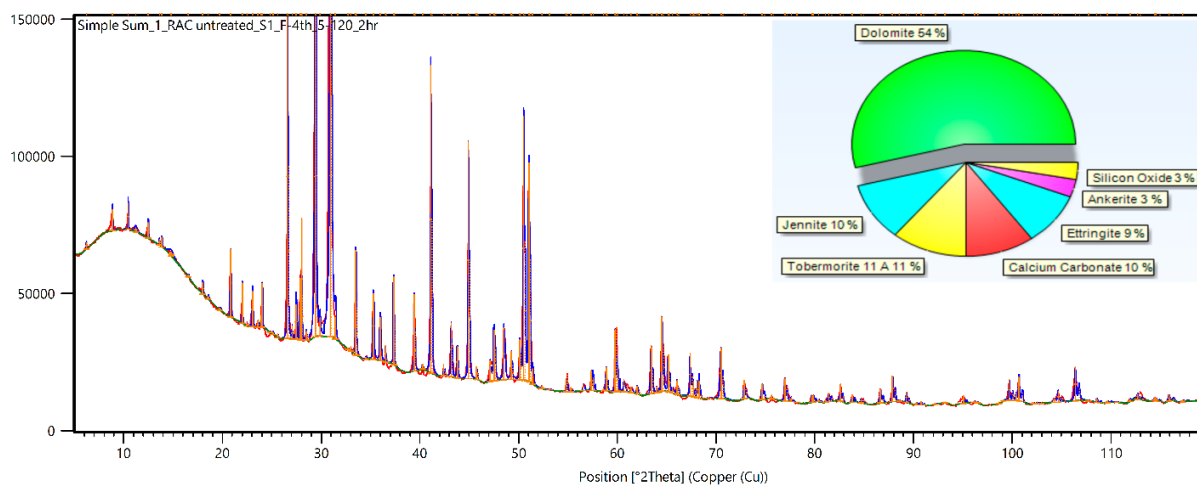

**Figure S2A: XRD analysis of untreated CRCA.**

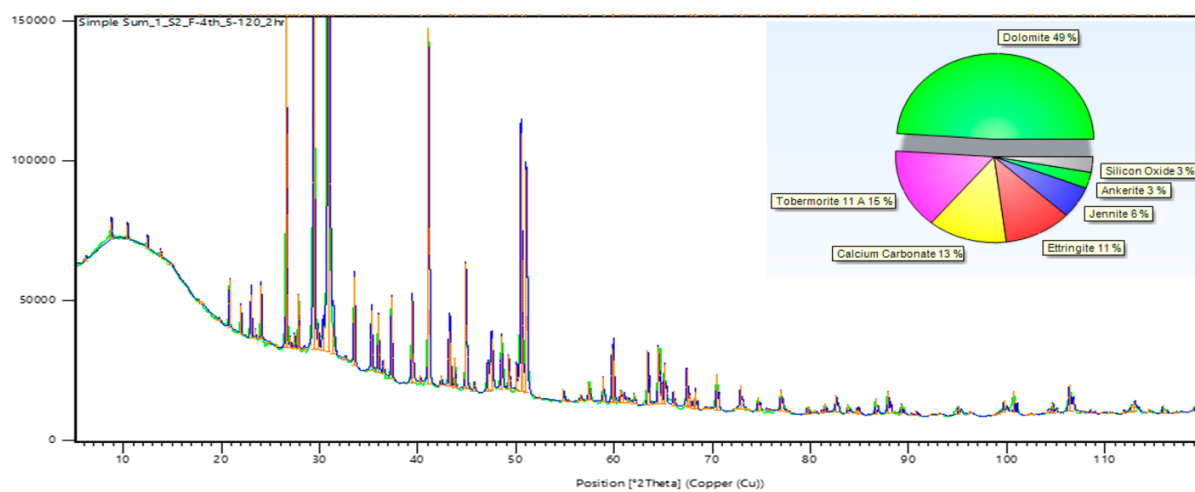

**Figure S2B: XRD analysis of treated CRCA with heat treatment at 250°C.**

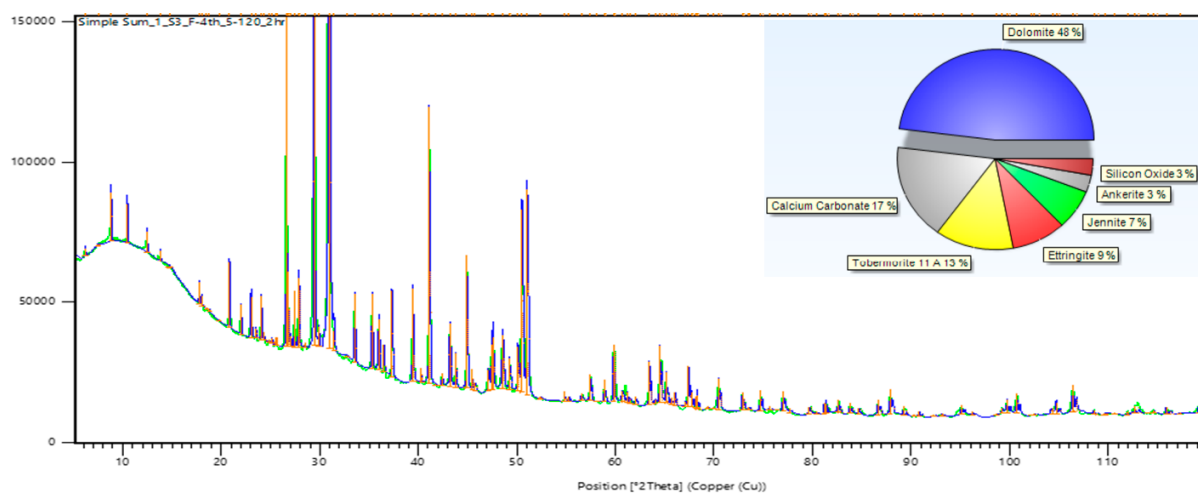

**Figure S2C: XRD analysis of treated CRCA with heat treatment at 350°C.**

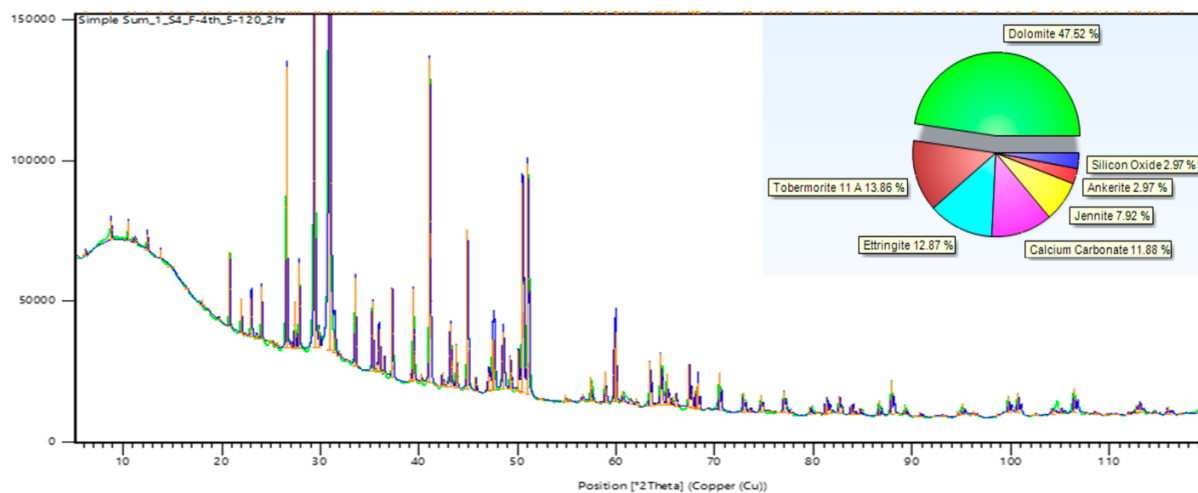

**Figure S2D: XRD analysis of treated CRCA with heat treatment at 500°C.**

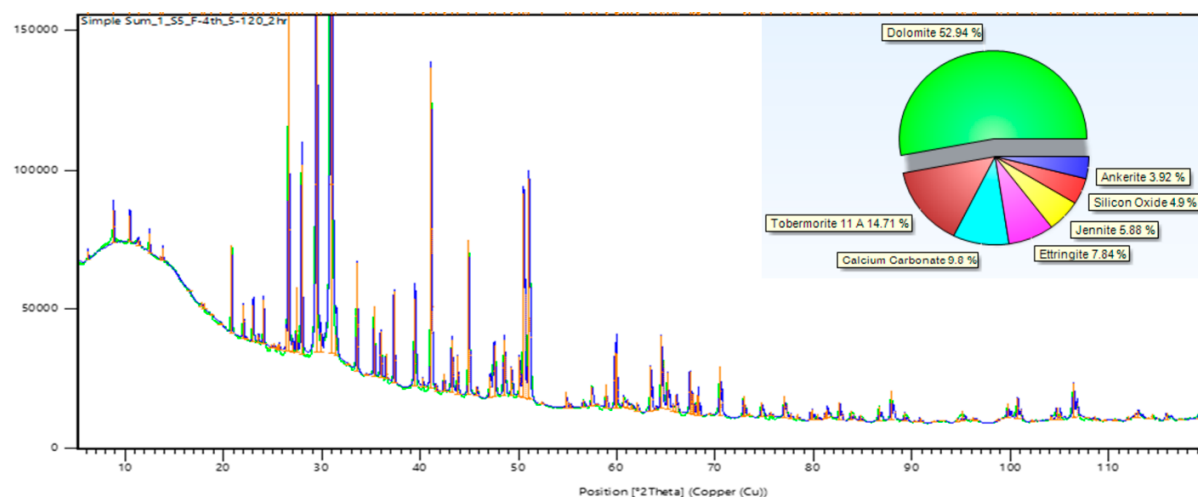

**Figure S2E: XRD analysis of treated CRCA with HCl acid.**

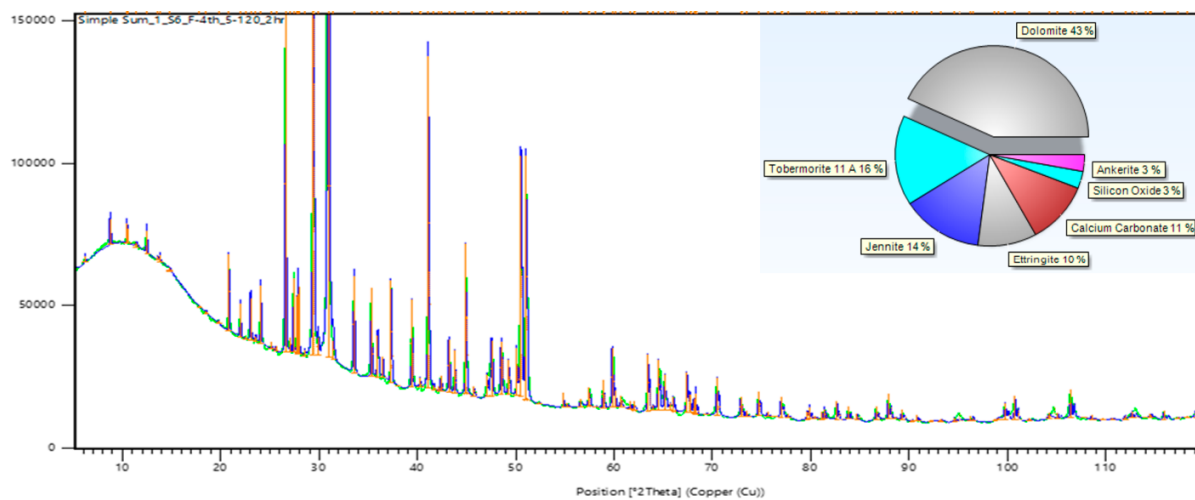

**Figure S2F: XRD analysis of treated CRCA with  $C_2H_4O$  acid.**
